# Supplementary material for: Natural Scaffolds with Multi-Target Activity for the Potential Treatment of Alzheimer’s Disease
Source: PubMed Central journal article supplement (PMC6225478; doi:10.3390/molecules23092182), 2018-08-29
Supplement: molecules-23-02182-s001.pdf [file molecules-23-02182-s001.pdf]

Supporting Information

**Natural scaffolds with multi-target activity for the potential treatment of Alzheimer's Disease**

**Luca Piemontese<sup>1,2,3,\*</sup>, Gabriele Vitucci<sup>1,2</sup>, Marco Catto<sup>1</sup>, Antonio Laghezza<sup>1</sup>, Filippo Maria Perna<sup>1,3</sup>, Mariagrazia Rullo<sup>1</sup>, Fulvio Loiodice<sup>1</sup>, Vito Capriati<sup>1,3</sup>, Michele Solfrizzo<sup>2</sup>.**

**The file includes:**

- Figure S1
- Figure S2
- Figure S3
- Figure S4
- Figure S5

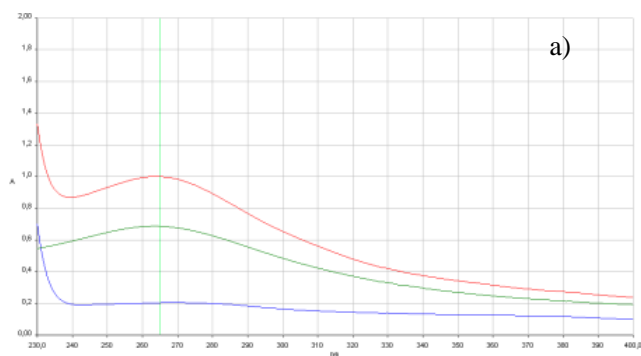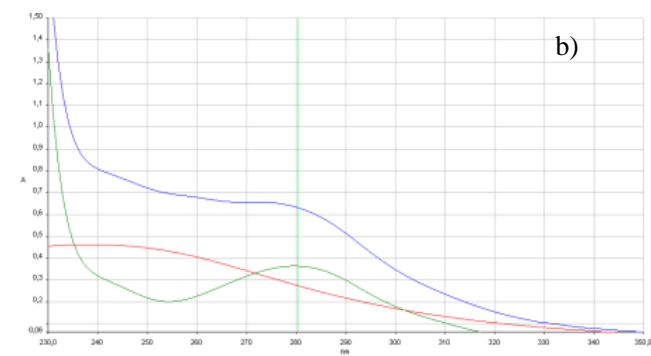

**Figure S1a.** UV spectra of copper (II) solution (green track), ligand solution (blue track) and copper(II)/ligand 4:1 solution (red track). **Figure S1b.** UV spectra of copper (II) solution (red track), ligand solution (green track) and copper(II)/ligand 4:1 solution (blue track). The experimental conditions are reported in Section 4.5. a) Clioquinol; b) compound **1**.

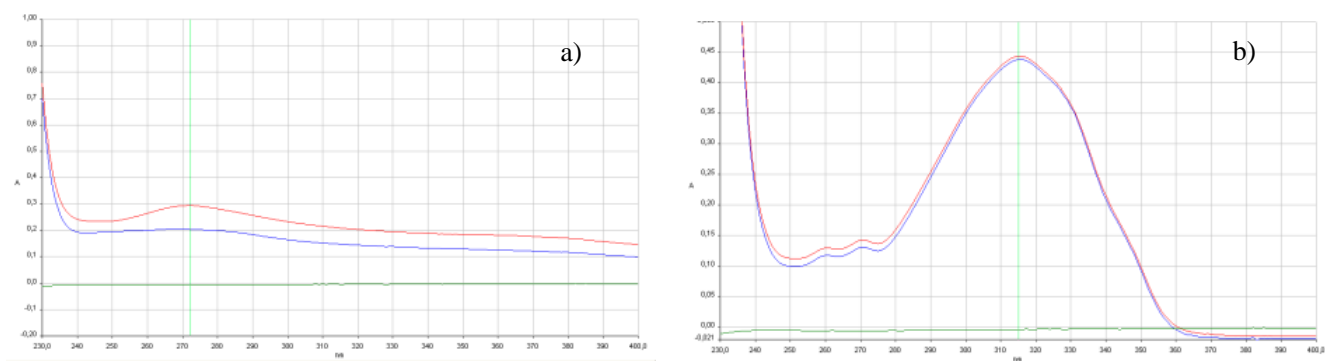

**Figure S2.** UV spectra of zinc (II) solution (green track), ligand solution (blue track) and copper(II)/ligand 4:1 solution (red track). The experimental conditions are reported in Section 4.5. a) Clioquinol; b) compound **2**.

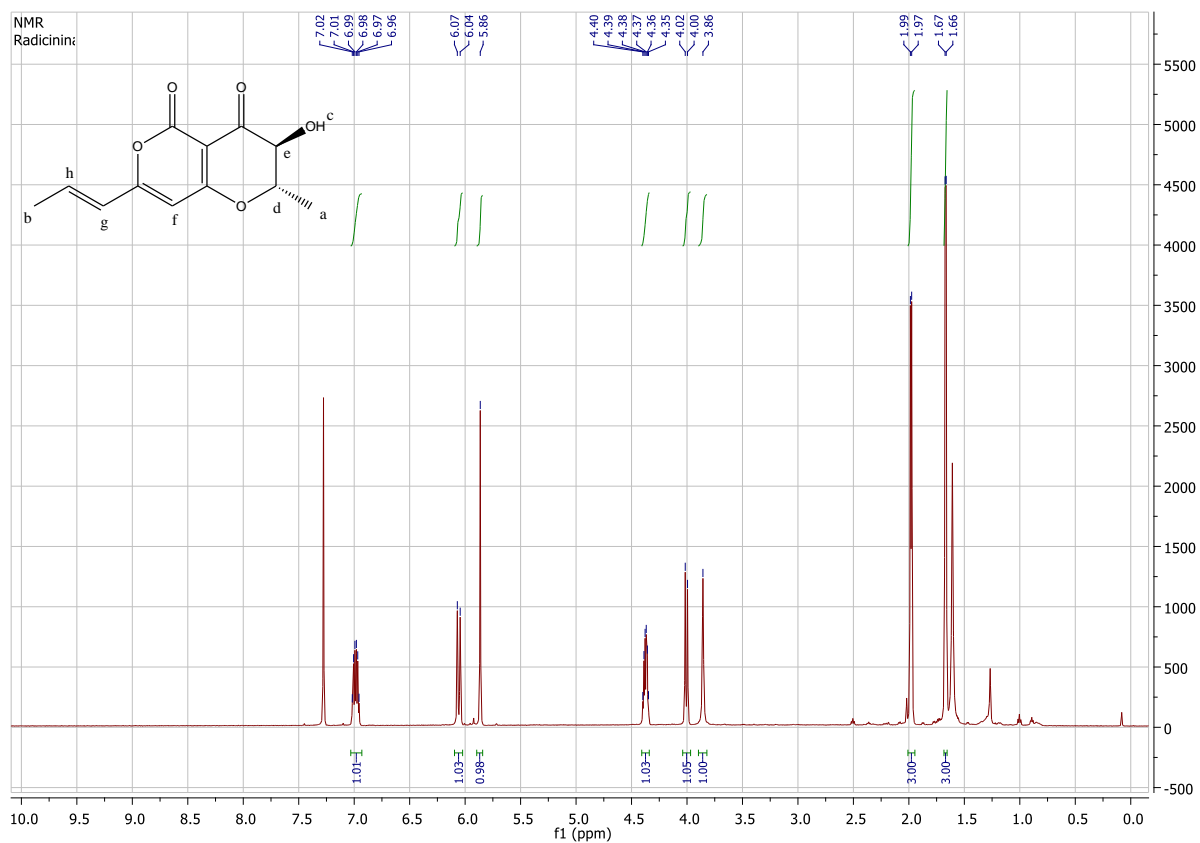

**Figure S3.**  $^1\text{H}$  NMR spectrum (CDCl<sub>3</sub>; 600 MHz) of Radicinin (purity > 97%).

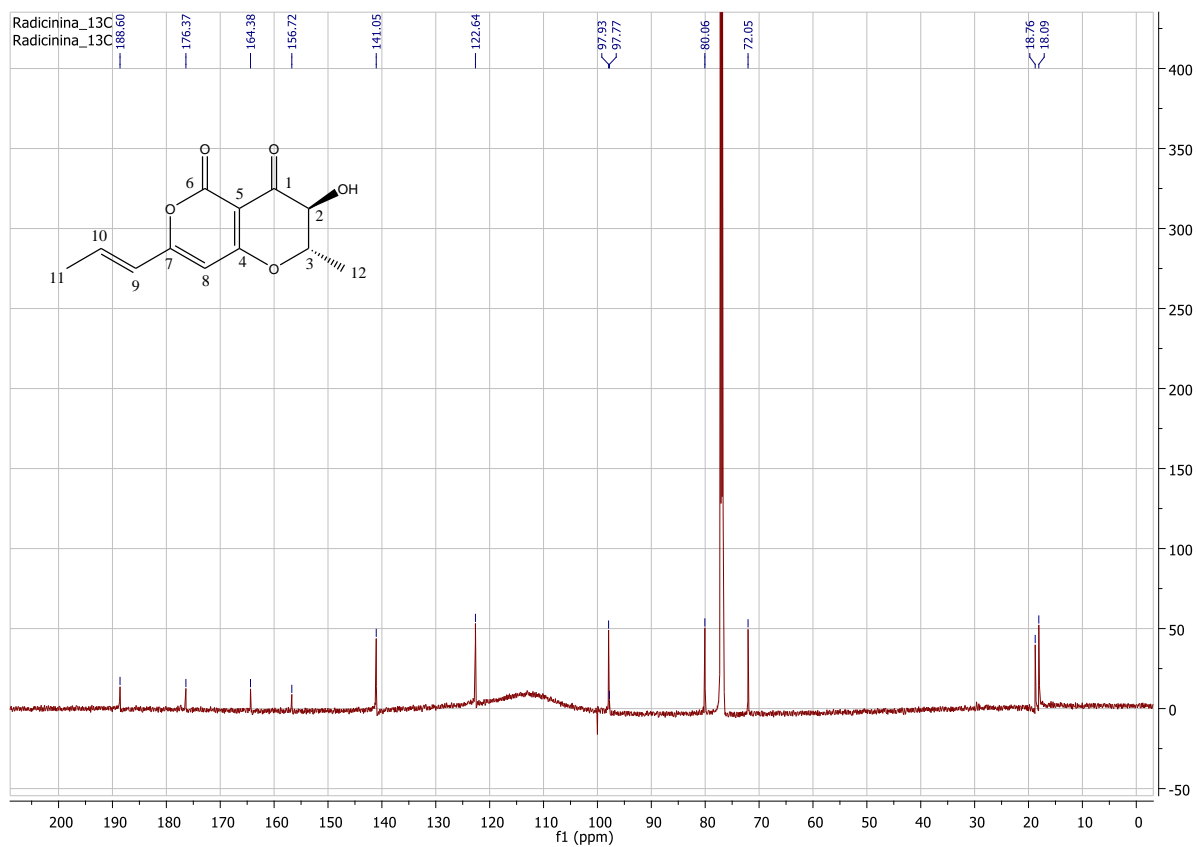

**Figure S4.** <sup>13</sup>C NMR spectrum (CDCl<sub>3</sub>; 125 MHz) of Radicinin (purity > 97%).

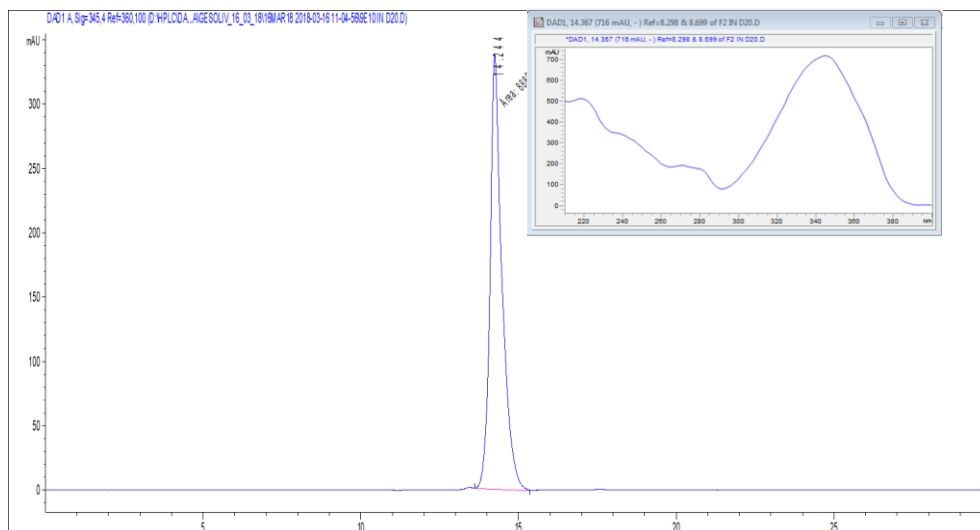

**Figure S5.** Chromatogram and UV spectrum of Radicinin (purity > 97%). The chromatographic conditions are reported in the text.
